# Supplementary material for: Assessment of factors influencing physicians’ intention to prescribe transfusion using the theory of planned behavior
Source: Springer Nature journal article supplement (doi:10.1186/s12913-023-09946-y), 2023-09-08
Supplement: MOESM2 [file 26021230]

|                                                                                                                                                                                                                                                                                                                                                                                                                                                                                                                            |
|----------------------------------------------------------------------------------------------------------------------------------------------------------------------------------------------------------------------------------------------------------------------------------------------------------------------------------------------------------------------------------------------------------------------------------------------------------------------------------------------------------------------------|
| 1. Gender: <input type="checkbox"/> Male <input type="checkbox"/> Female                                                                                                                                                                                                                                                                                                                                                                                                                                                   |
| 2. Age: <input type="checkbox"/> 20~25 <input type="checkbox"/> 26~30 <input type="checkbox"/> 31~35 <input type="checkbox"/> 36~40 <input type="checkbox"/> 41~50 <input type="checkbox"/> 51~60 <input type="checkbox"/> >61                                                                                                                                                                                                                                                                                             |
| 3. Education level: <input type="checkbox"/> Diploma <input type="checkbox"/> Bachelor's degree <input type="checkbox"/> Master's <input type="checkbox"/> Ph.D                                                                                                                                                                                                                                                                                                                                                            |
| 4. Hospital position and years experience (please specify):<br><input type="checkbox"/> Specialist physician (>5 years)<br><input type="checkbox"/> Junior specialist physician (<5 years)<br><input type="checkbox"/> Chief Resident doctor<br><input type="checkbox"/> Resident doctor<br><input type="checkbox"/> Intern doctor <input type="checkbox"/> Clerk<br><input type="checkbox"/> Nurse practitioner<br><input type="checkbox"/> Lab technician<br>The number of years experience after you got license: _____ |
| 5. Which specialty are you currently working in (please specify):<br><input type="checkbox"/> Internal medicine : _____ <input type="checkbox"/> Surgery: _____<br><input type="checkbox"/> Pediatrics: _____ <input type="checkbox"/> Obstetrics-gynecology: _____<br><input type="checkbox"/> Other clinical specialty: _____ <input type="checkbox"/> Post-graduate year (PGY)<br><input type="checkbox"/> Internship <input type="checkbox"/> Clerkship                                                                |
| 6. Work location (please check all that applies):<br><input type="checkbox"/> Ward <input type="checkbox"/> Intensive Care Unit <input type="checkbox"/> Emergency department <input type="checkbox"/> Outpatient clinic <input type="checkbox"/> Operating theater<br><input type="checkbox"/> Recovery room <input type="checkbox"/> Haemodialysis Unit <input type="checkbox"/> Chemotherapy unit <input type="checkbox"/> Laboratory<br><input type="checkbox"/> Other: _____                                          |
| The following questions are based on your understanding of blood product transfusion policy and processes, please choose the most appropriate response.                                                                                                                                                                                                                                                                                                                                                                    |
| <b>7. I understand the whole process of product transfusion, from the physician's order to patient transfusion.</b><br><input type="checkbox"/> Strongly agree<br><input type="checkbox"/> Agree<br><input type="checkbox"/> Neither agree nor disagree<br><input type="checkbox"/> Disagree<br><input type="checkbox"/> Strongly disagree                                                                                                                                                                                 |
| <b>8. I understand that under some circumstances, patients' blood products may not need to undergo crossmatching test.</b><br><input type="checkbox"/> Strongly agree<br><input type="checkbox"/> Agree<br><input type="checkbox"/> Neither agree nor disagree<br><input type="checkbox"/> Disagree<br><input type="checkbox"/> Strongly disagree                                                                                                                                                                          |
| <b>9. I understand the Patient Blood Management Checklist.</b><br><input type="checkbox"/> Strongly agree<br><input type="checkbox"/> Agree<br><input type="checkbox"/> Neither agree nor disagree<br><input type="checkbox"/> Disagree<br><input type="checkbox"/> Strongly disagree                                                                                                                                                                                                                                      |
| <b>10. At what platelet count would you provide a prophylactic platelet transfusion for patients with hematologic disorder (e.g., AML)</b><br><input type="checkbox"/> 5,000/ul<br><input type="checkbox"/> 10,000/ul<br><input type="checkbox"/> 20,000/ul<br><input type="checkbox"/> 50,000/ul<br><input type="checkbox"/> 100,000/ul                                                                                                                                                                                   |

**11. What is the acceptable range for Blood to Plasma ratio?**

- Less than 1  Maintained at 1~2  Greater than 2  Unaware

**12. The cost of transfusion a unit of packed RBC.**

- NTD 45  
 NTD 75  
 NTD 450  
 NTD 750

**13. The cost of transfusion a unit of leukocyte poor plateletpheresis.**

- NTD 450  
 NTD 750  
 NTD 4500  
 NTD 7500

The following questions are based on your understanding of blood product transfusion policy and processes, please choose the most appropriate response.

**14. It is important for doctors to regulate the amount of blood product transfusion orders.**

- Strongly agree  
 Agree  
 Neither agree nor disagree  
 Disagree  
 Strongly disagree

**15. To prevent a shortage of blood products, I think it is necessary to control the number of blood product requests.**

- Strongly agree  
 Agree  
 Neither agree nor disagree  
 Disagree  
 Strongly disagree

**16. In general, when managing patients with slight lower hemoglobin (Hb) levels compared with the trigger for required transfusion, I would observe symptoms/signs and keep monitoring the Hb prior to prescribing the blood transfusion directly.**

- Strongly agree  
 Agree  
 Neither agree nor disagree  
 Disagree  
 Strongly disagree

**17. Most literature advocates for stringent regulations regarding requesting blood components.**

- Strongly agree  
 Agree  
 Neither agree nor disagree  
 Disagree  
 Strongly disagree

**18. When ordering blood products, I may be influenced by advice from physicians who specialize in blood banking/transfusion medicine.**

- Strongly agree  
 Agree  
 Neither agree nor disagree  
 Disagree  
 Strongly disagree

**19. When ordering blood products, I may be influenced by advice from medical technicians.**

- Strongly agree  
 Agree  
 Neither agree nor disagree  
 Disagree  
 Strongly disagree

**20. When ordering blood products, I may be influenced by advice from the transfusion committee.**

- Strongly agree
- Agree
- Neither agree nor disagree
- Disagree
- Strongly disagree

**21. When ordering blood products, I may be influenced by advice from clinical guideline and important publications.**

- Strongly agree
- Agree
- Neither agree nor disagree
- Disagree
- Strongly disagree

**22. To manage patients with borderline hemoglobin level, I am confident in myself to watch his/her condition to assess if there's an unmet need for transfusion.**

- Strongly agree
- Agree
- Neither agree nor disagree
- Disagree
- Strongly disagree

**23. To manage patients with borderline hemoglobin level, I am confident in myself to assess the type and the number of units of blood products required.**

- Strongly agree
- Agree
- Neither agree nor disagree
- Disagree
- Strongly disagree

**24. To manage patients with borderline hemoglobin level, I would consider alternatives rather than requesting for blood transfusion.**

- Strongly agree
- Agree
- Neither agree nor disagree
- Disagree
- Strongly disagree

**25. It is possible for me to control the number of blood product requests I make.**

- Strongly agree
- Agree
- Neither agree nor disagree
- Disagree
- Strongly disagree

**26. I assess the patients' clinical status prior to ordering blood products.**

- Strongly agree
- Agree
- Neither agree nor disagree
- Disagree
- Strongly disagree

**27. To determine estimated blood loss, I consider the patient's clinical symptoms, laboratory data or images.**

- Strongly agree
- Agree
- Neither agree nor disagree
- Disagree
- Strongly disagree

**28. I order blood components based on patients' clinical indications and circumstance.**

- Strongly agree
- Agree
- Neither agree nor disagree
- Disagree
- Strongly disagree
